# Supplementary material for: Choice of Voxel-based Morphometry processing pipeline drives variability in the location of neuroanatomical brain markers
Source: Springer Nature journal article supplement (doi:10.1038/s42003-022-03880-1), 2022-09-06
Supplement: 42003_2022_3880_MOESM1_ESM.pdf [file 42003_2022_3880_MOESM1_ESM.pdf]

## **Supplemental material**

Zhou et al.

**Supplemental Figures S1-S19**

**Supplemental Tables S1-S16**

### **Correspondence:**

Benjamin Becker, (ben\_becker@gmx.de)

Xinqi Zhou, (xinqizhou.uestc@outlook.com)

Center for Information in Medicine

University of Electronic Science and Technology of China

Chengdu 611731, China

Tel.: +86 2861 830 811

## Supplemental methods

### *Structural MRI acquisition parameters*

Both datasets were acquired using validated T1-weighted brain structural acquisition protocols. Dataset 1 was acquired on a 3.0 Tesla GE MR750 system (General Electric Medical Systems, Milwaukee, WI, USA). T1-weighted high-resolution anatomical images were acquired with a spoiled gradient echo pulse sequence, repetition time (TR) = 5.9 ms, echo time (TE) = 2 ms, flip angle = 9°, field of view (FOV) = 256 × 256 mm, acquisition matrix = 256 × 256, thickness = 1 mm, number of slices = 156, voxel size = 1×1×1 mm. Dataset 2 was collected using a 3.0-T Siemens Trio MRI scanner (Siemens Medical, Erlangen, Germany). A magnetization-prepared rapid gradient echo (MPRAGE) sequence was used to acquire high-resolution T1-weighted anatomical images (repetition time = 1,900 ms, echo time = 2.52 ms, inversion time = 900 ms, flip angle = 90°, resolution matrix = 256 × 256, slices = 176, thickness = 1.0 mm, and voxel size = 1×1×1 mm)<sup>1</sup>.

### *Overlapping percent of mass-univariate analyses*

To estimate the consistency in terms of spatial overlap between the pipelines percent overlapping voxels were calculated for the pipeline-specific results on sex differences and age-related changes respectively (Table S10 & S11). The following formula was applied:

$$p_i = \frac{v_i}{v_{all}} \times 100$$

$p_i$  indicates the overlapping percent of  $i^{\text{th}}$  overlapping or independent cluster voxels ( $v_i$ ) in voxels of all significant results ( $v_{all}$ ), which represents the union set of the four pipelines.

### *ICC calculation*

To estimate the replicability of preprocessed data across pipelines the intraclass correlation coefficient (ICC) implemented by a linear mixed model in DPABI was used<sup>2</sup>. In DPABI two forms of voxel-wise ICC calculation are provided. The current study employed ICC(3,1) using linear mixed models, which means each target is assessed by the same raters and these raters are the only raters of interest (i.e. pipelines in our study). As described in the previous literature<sup>2</sup> a two-level linear mixed model was applied to the decomposition of  $Y_{ij}$  (the value of the  $j$ -th participant's  $i$ -th measurement occasion). In the current case,  $Y_{ij}$  denotes the GM from the  $j$ -th participant's  $i$ -th pipeline. The two-level linear mixed model was applied to each voxel as the following decomposition of  $Y_{ij}$ :

$$Y_{ij} = \mu_j + e_{ij}$$
$$\mu_j = \mu' + e'_j$$

where  $\mu'$  is a fixed parameter and  $e_{ij}$  and  $e'_j$  are independent random effects which have normal distribution with mean 0 and variances  $\delta_e^2$  and  $\delta_{e'}^2$ . The term  $e'_j$  is the participant effect and  $e_{ij}$  is the measurement error across pipelines. The

variance terms are estimated with the restricted maximum likelihood approach. Thus the ICC formula is defined as:

$$ICC = \frac{\delta_{e'}^2}{\delta_{e'}^2 + \delta_e^2}$$

## **Supplemental results**

### *Spatial similarity within- and between-pipelines*

In the male sample, the ANOVA revealed that main effects of pipeline were significant with respect to all pipeline and sample homogeneity comparisons, including between pipelines and between participants ( $F = 4635, p < 0.0001$ ), between pipelines and within participants ( $F = 179, p < 0.0001$ ), and within pipelines and between participants ( $F = 14208, p < 0.0001$ ). The post hoc tests were conducted with appropriate Bonferroni correction for the number of tests (Table S1, S3, and S5).

In the female sample, the ANOVA revealed that main effects of pipeline were significant with respect to all pipeline and sample homogeneity comparisons, including between pipelines and between participants ( $F = 3535, p < 0.0001$ ), between pipelines and within participants ( $F = 196.1, p < 0.0001$ ), and within pipelines and between participants ( $F = 9894, p < 0.0001$ ). The post hoc tests were conducted with appropriate Bonferroni correction for the number of tests (Table S2, S4, and S6).

For dataset 2, the ANOVA revealed that main effects of pipeline for all homogeneity comparisons, including between pipelines and between participants ( $F = 61376, p < 0.0001$ ), between pipelines and within participants ( $F = 593.7, p < 0.0001$ ), and within pipelines and between participants ( $F = 290745, p < 0.0001$ ). Post hoc tests were conducted with Bonferroni's correction for the number of tests (Table S7, S8, and S9).

In summary, the spatial similarity analyses for three homogeneity comparisons revealed significant main effects of pipeline, in particular a high spatial similarity within the data processed by the CAT pipeline and a high variation between pipelines (Fig. S2 and S3) for both dataset 1 and 2 (Bonferroni corrected  $p < 0.01$ ).

### *Between-group approach: sex differences univariate analyses*

Results from the non-parametric statistics with TFCE  $p_{FWE} < 0.05$  were highly similar to the parametric statistic results, suggesting that the pipeline differences are robust across statistic models. For instance, across pipelines males had higher GMV than females (FSLANAT, FSLVBM, and CAT had 18.89% overlaps, Table 1) in the precuneus, bilateral putamen, insula, olfactory cortex, parahippocampal cortex, and cerebellum (Fig.S4a, while for the FSL pipelines (FSLANAT and FSLVBM had 9.33% overlap, Table 1) females had higher GMV in inferior parietal lobule, postcentral cortex, and angular gyrus. Again, the software packages revealed widespread differences with respect to sex-differences in GMV in limbic, frontal and cerebellar regions. Notably, in some instances the overlap between the software packages increased slightly using the non-parametric approach (Table 1 and Fig. S4a).

### *Association approach: age-related effects from univariate analyses*

Regarding to non-parametric statistics with TFCE  $p_{FWE} < 0.05$ , the results were very similar with parametric statistics, especially for the brain regions that decreased with age. FSLVBM revealed age-related increases from prefrontal cortex to parietal lobe to cerebellum, and bilateral hippocampus, while sMRIPrep revealed caudate and cerebellum. In addition, CAT highlighted thalamus, but only FSLVBM and sMRIPrep identified common cerebellar regions that increased with age (Fig. S4b and Table 2). Whereas CAT and sMRIPrep revealed age-related decreases in widespread regions covering nearly the entire cortex, the other pipelines revealed more regional-specific decreases with age, such that FSLANAT revealed specific decreases in the inferior frontal gyrus and middle occipital gyrus. FSLVBM additionally revealed regional decreases in middle cingulate cortex, frontal and temporal cortex. Again, the common brain regions across four pipelines that decreased with age only included the middle occipital gyrus (Fig. S4b). Except for FSLANAT the common regions of the other pipelines included medial prefrontal cortex, cingulate gyrus, precuneus, temporal lobe, parietal lobe, middle occipital gyrus, insula, and cerebellum (Fig. S4b).

### *Validation of the multivariate sex-predictive pattern in dataset 2*

The developed sex-predictive patterns were further validated on dataset 2 (Fig. S10) with an averaged classification accuracy of 66.33% (SD = 3.22, range = 61.94% ~ 71.86%). Given that the age range in dataset 2 was considerably higher than in the initial training dataset we limited the age range in dataset 2 to  $\leq 30$  years, which increased classification accuracy in this sample (n = 159, female = 99) to an average of 71.82% (SD = 6.33, range = 61.64% ~ 87.42%, corresponding Cohen's d in Table S10). The highest accuracy (87.42%, Cohen's d = 2.2062) appeared when using the pattern from CAT on data processed by CAT pipeline, followed by the pattern developed from FSLANAT applied to data processed by sMRIPrep (77.99%, Cohen's d = 1.2160).

### *Exploring the effects of template and spatial similarity outliers*

To address the effects of template across all pipelines we did additional analyses with all data processed by a common template from CAT. Of note this step can explore the template differences, yet given that the spatial registration algorithms differ, i.e. geodesic shooting registration in CAT<sup>3</sup> vs non-linear registration in the other pipelines (<https://fsl.fmrib.ox.ac.uk/fsl/fslwiki/FNIRT/UserGuide>), this approach can only help to determine template effects per se but not differences due to registration algorithm or template times registration interaction effects. First we explored the sex differences and age associations as same as the main manuscript. Then the results generally confirmed that differences between pipelines remained after controlling for the different template (Fig. S5). Second we conducted a direct statistical comparison between the pipeline data via a within-subject one-way ANOVA with sex, age and TIV for original preprocessed data, new preprocessed data with a common template and

the new preprocessed data plus same TIV calculation respectively. The results from the ANOVA as well as post-hoc comparisons directly comparing the pipelines further confirmed that significant and widespread differences between pipelines could be observed not only in the processing according to the pipeline manuals but also after processing with same template, or processing with same template and identical TIV calculation (Fig. S6 & S7 & S8), respectively.

To address the quality assessment after spatial normalization with a common template, we checked the images by means of assessing sample homogeneity (inter-participant spatial similarity) a quality assessment approach that is also employed by CAT. Although, the relationship between sample homogeneity and image quality is not clear, looking for outliers in a population of subjects (or images in this case) represents a basic but robust quality assessment procedure. To this end we first calculated the inter-participant correlation matrix within each pre-processed dataset and pipeline. Next, images with a mean correlation below 2 standard deviations were identified within each dataset leading to the exclusion of different subjects: dataset 1:  $n = 7$  for CAT,  $n = 11$  for FSLVBM,  $n = 7$  for FSLANAT,  $n = 10$  for sMRIPrep, dataset 2:  $n = 23$  for FSLVBM,  $n = 8$  for FSLANAT,  $n = 14$  for sMRIPrep,  $n = 22$  for CAT. Next we reran the main analyses assessing effects of pipeline on sex-differences and age associations. Briefly, the results revealed that after controlling template effect and excluding low spatial similarity images results for both analyses changed (Fig. S9). In particular, for the sex-differences only the FSLVBM pipeline showed significant differences for both male > female and male < female in the dataset 1, while in dataset 2 results of positive age association remained stable yet for the negative association a considerable increase in overlap between the pipelines was observed (Table S14, 48.60% compared to 0.002%, see also Table 2 in the main text).

#### *Additional exploratory MVPA analysis for sex differences*

To explore whether integrating all features from all pipelines would enhance the predicted performance we concatenated the training data from each pipeline and we detected stable features (GMV) with bootstrapping test (5,000,  $p_{FDR} < 0.05$ ) for sex prediction. The identified brain pattern considerably overlapped with the patterns determined by each pipeline (Fig. S19a). Then this pattern was used to predict independent test data which was concatenated too (Fig. S19b), and independent data from each pipeline (Fig. S19c). In general, the cross-pipeline prediction improved while the within-pipeline prediction slightly decreased. Together this may tentatively suggest that utilizing data processed by different pipelines may improve the performance and generalization of MVPA-based GMV map decoders which opens interesting opportunities to improve biomarker development.

## Supplemental figures

Results per 100,000 citations in PubMed  
proportion for each search by year, 1970 to 2021

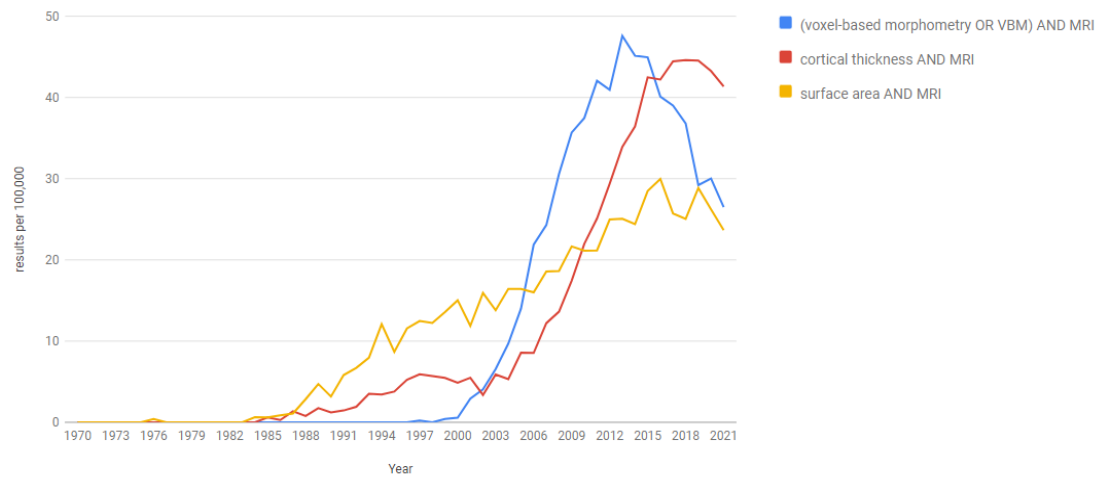

Fig. S1. Results per 100,000 citations of searching terms “(voxel-based morphometry OR VBM) AND MRI”, “cortical thickness AND MRI”, and “surface area AND MRI” in PubMed created by <https://esperr.github.io/pubmed-by-year>.

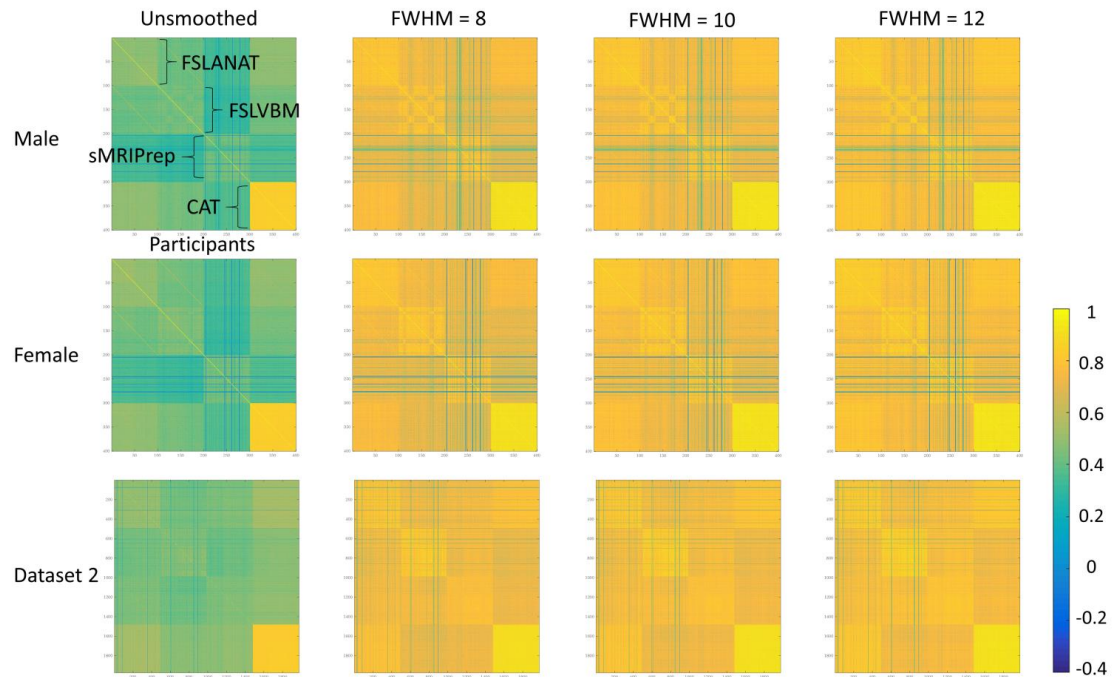

Fig. S2. Spatial similar maps across the processing pipelines. Top and middle rows correspond to male and female samples separately from dataset 1. The bottom row shows data from the entire sample of dataset 2. Each column corresponds to a smoothing level (unsmoothed, 8, 10, and 12mm FWHM). The color grading reflect  $r$  values ranging from -0.4 to 1 (no  $r$  value was lower than -0.4). Each line of both  $x$  and  $y$  axes in each matrix map refers to one participant.

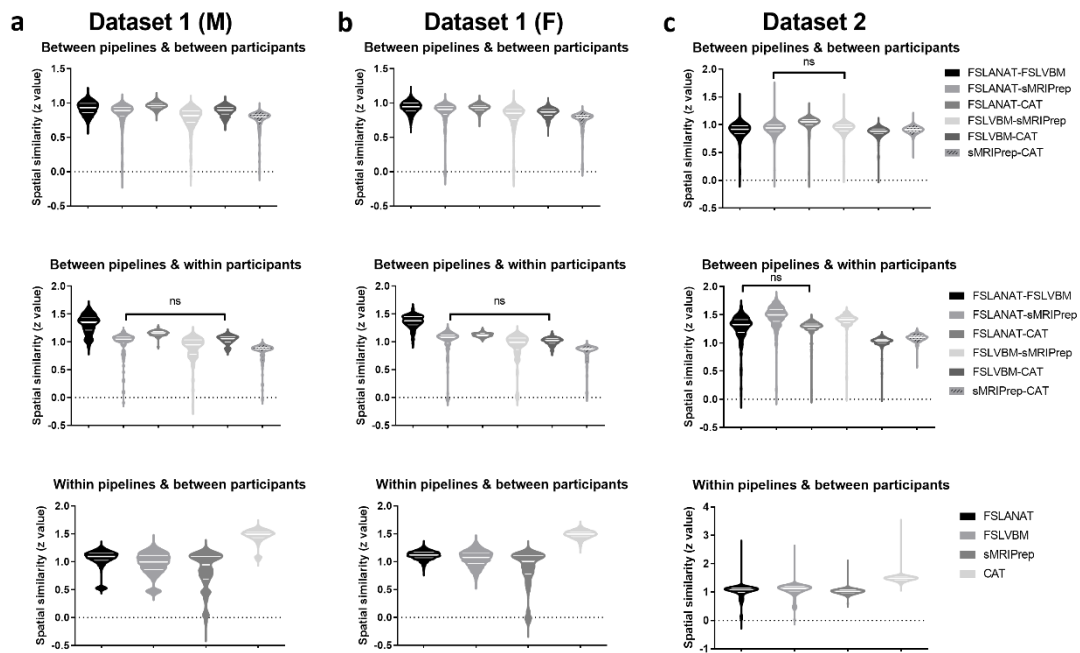

Fig. S3. Mean similarity and standard deviation (SD) of different pipelines and pipeline pairs. Column a and b display the data from dataset 1 for males (a) and females (b) respectively. Column c displays the data from dataset 2. Post hoc tests were controlled for multiple comparison using a Bonferroni corrected  $p < 0.01$ . M = males, F = females, n.s. = non-significant.



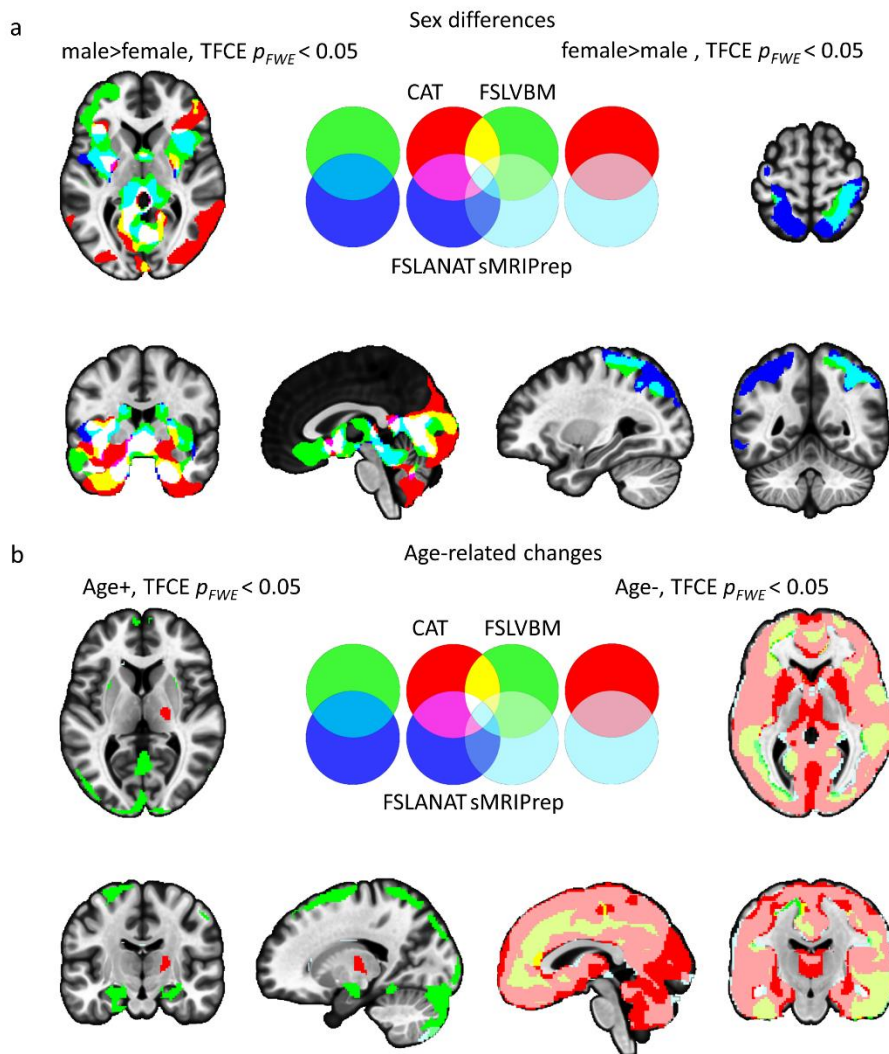

Fig. S4. Similarities and dissimilarities between the pipelines with respect to determining GMV sex differences. Displayed of a and b are results from non-parametric statistics (TFCE with 5,000 permutations) overlapping at  $p_{FWE} < 0.05$ . The left panels of a display results for the male>female contrast. The right panels of a correspond to the female>male contrast. The left panels of b depicts brain regions with increasing GMV with age. The right panels of b depict decreases with age. Red = CAT, green = FSLVBM, blue = FSLANAT, light blue = sMRIPrep, other colors visualize the overlap between the results.

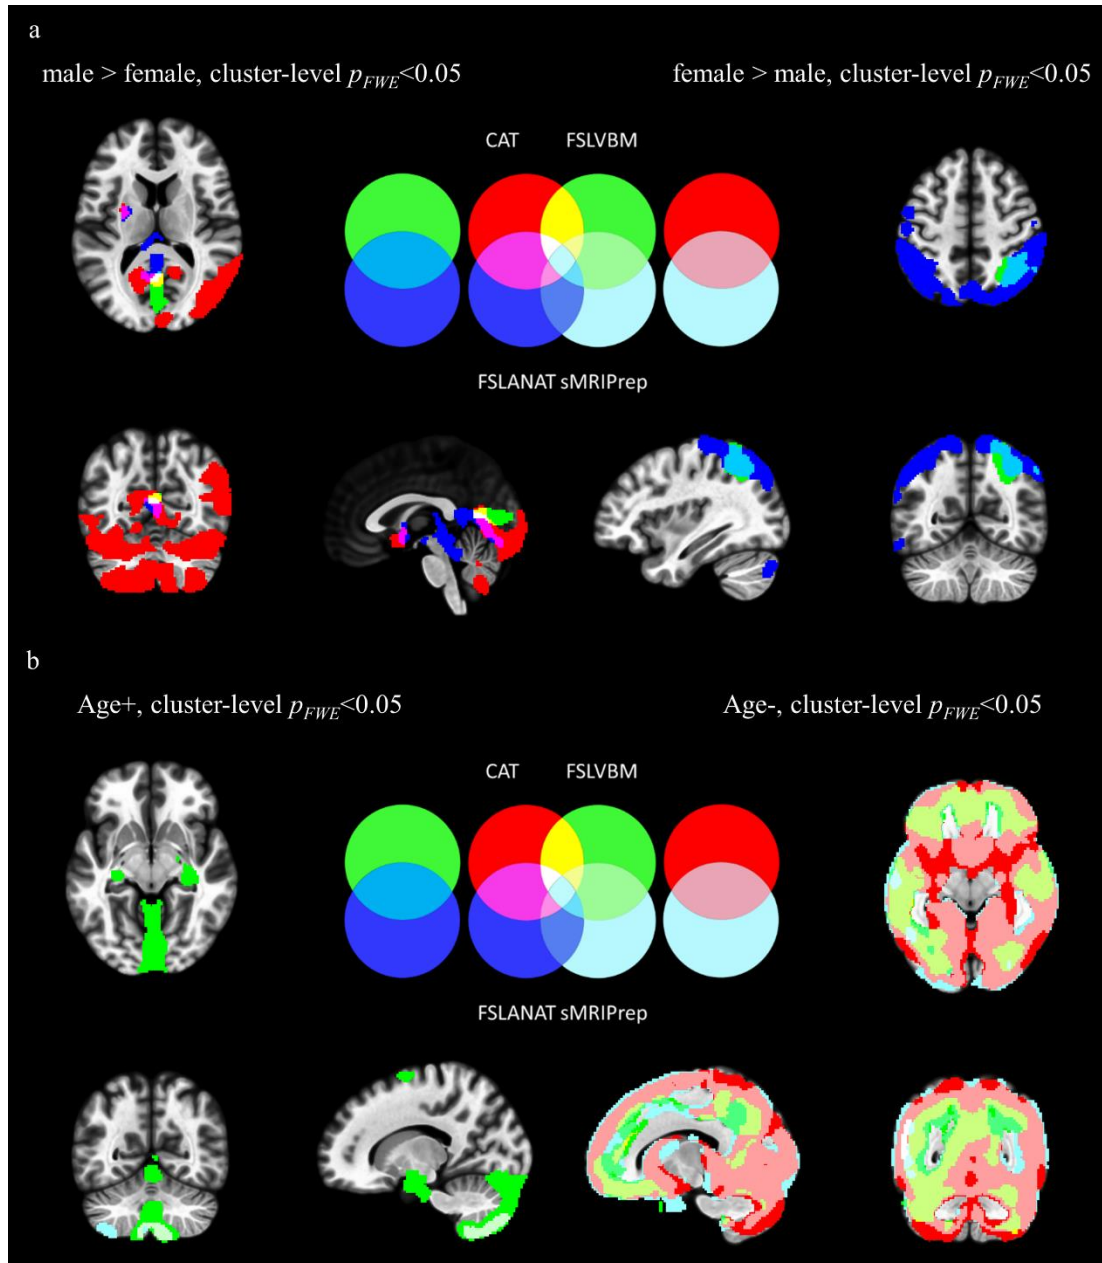

Fig. S5. Results regarding sex differences (a) and age associations (b) after excluding template effect.

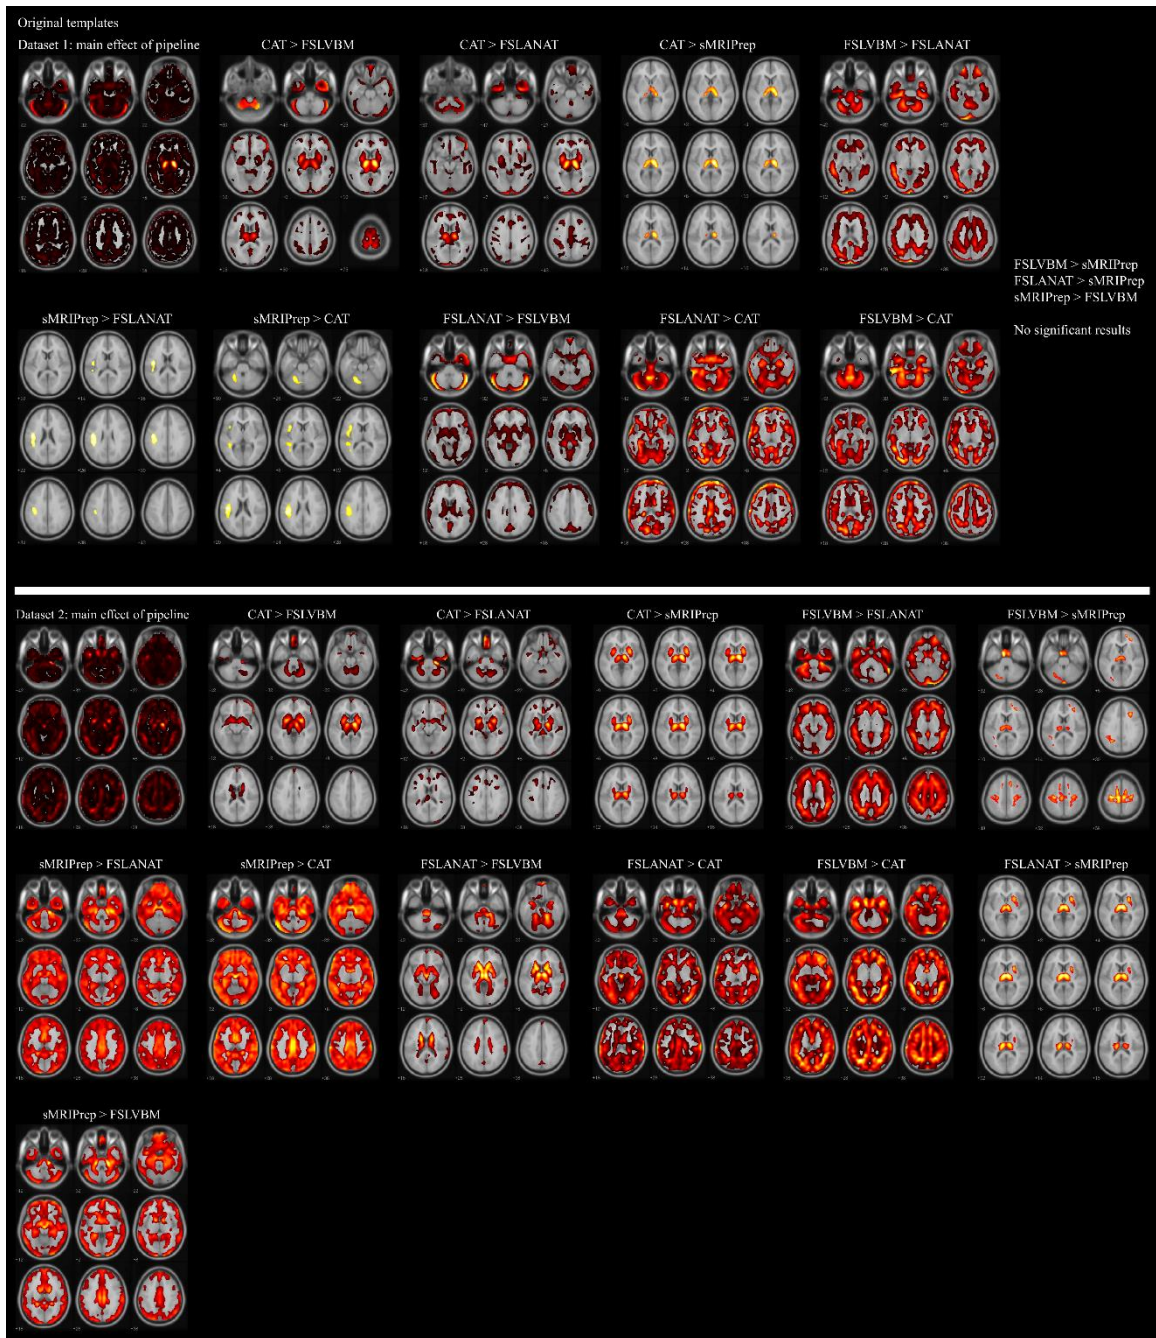

Fig. S6. Direct comparisons between pipelines using the original preprocessed data (both dataset 1 and 2). All results passed cluster level  $p_{FWE} < 0.05$ .

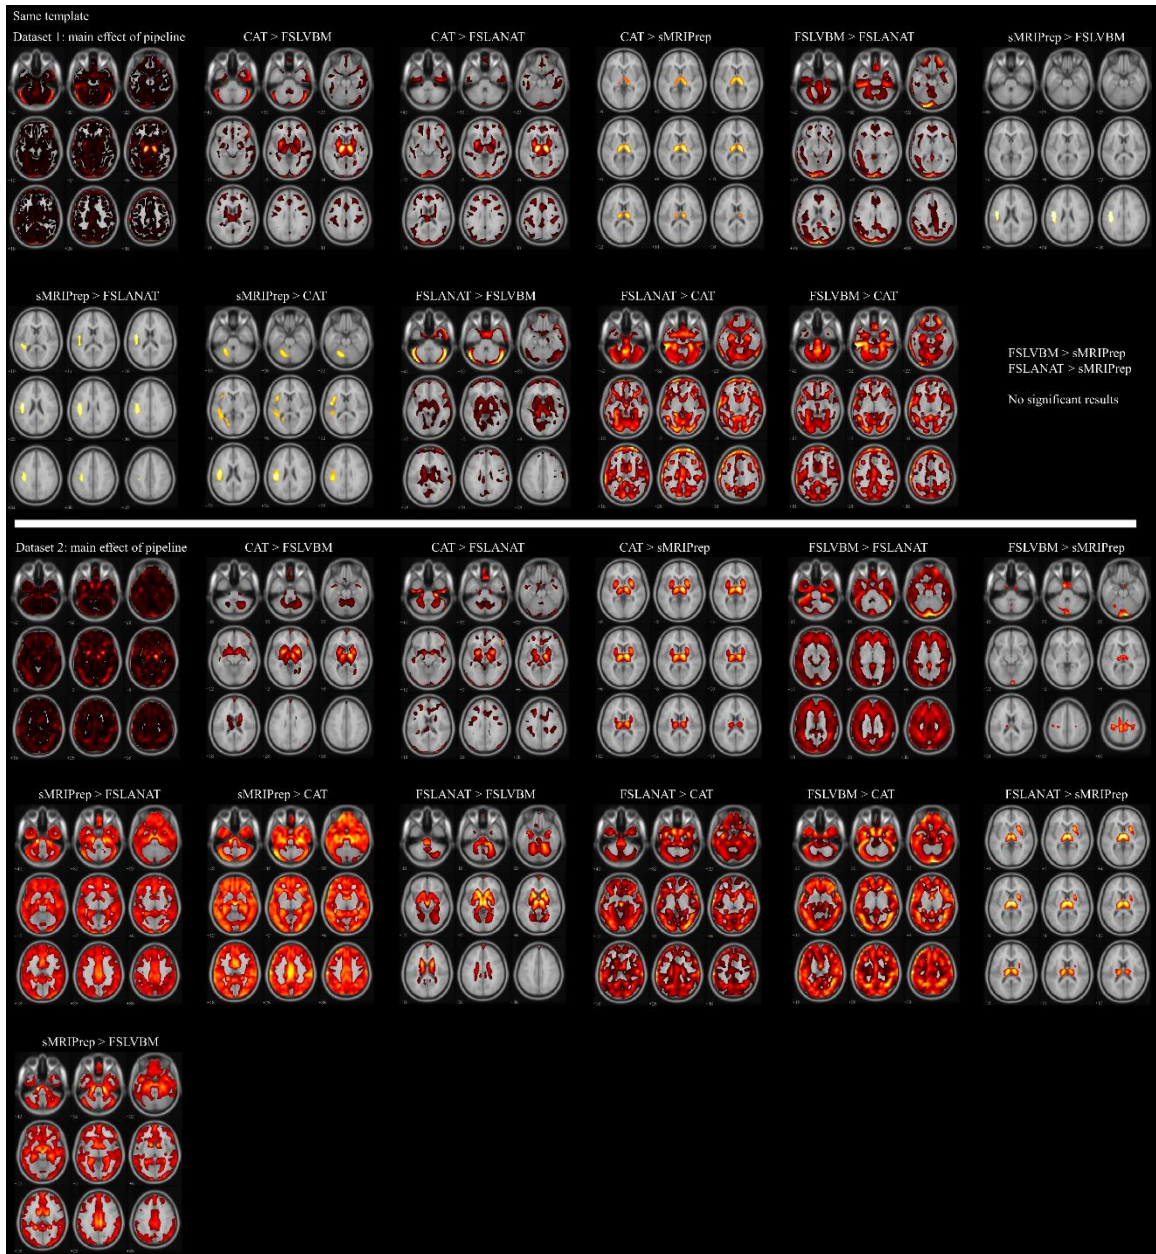

Fig. S7. Direct comparisons between pipelines using the preprocessed data with the same template across pipelines (both dataset 1 and 2). All results passed cluster level  $p_{FWE} < 0.05$ .

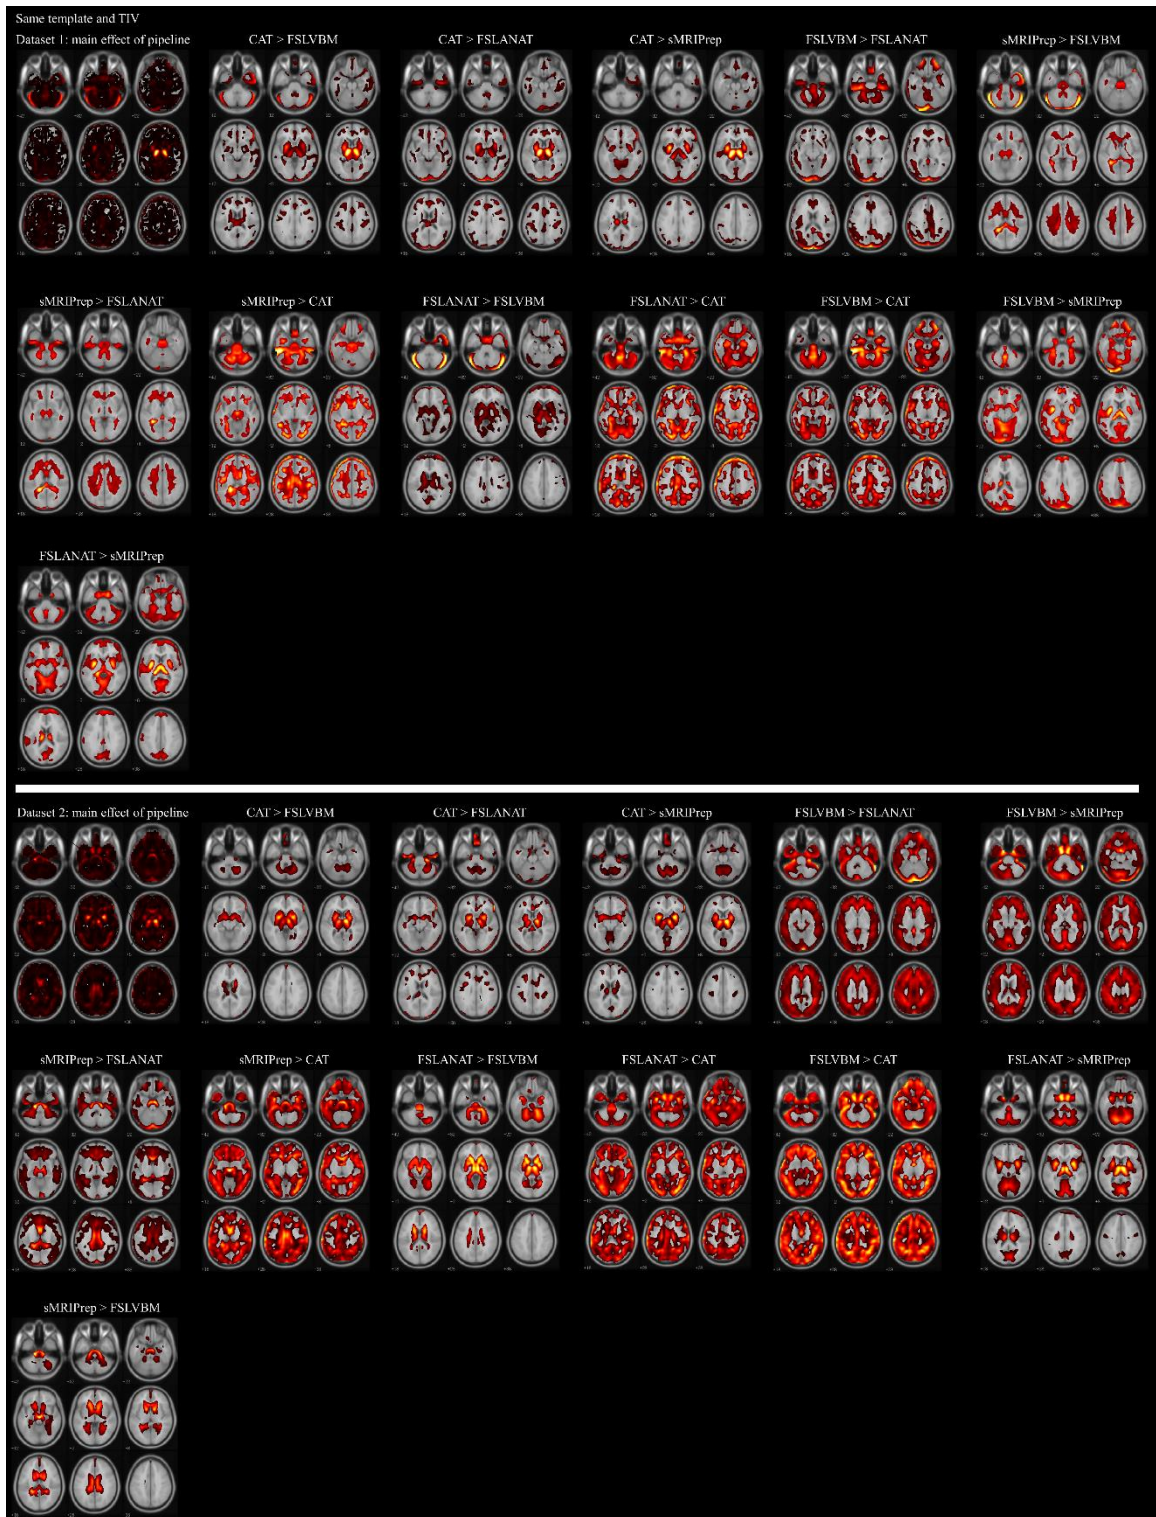

Fig. S8. Direct comparisons between pipelines using the preprocessed data with the same template and the same TIV calculation (both dataset 1 and 2). All results passed cluster level  $p_{FWE} < 0.05$ .

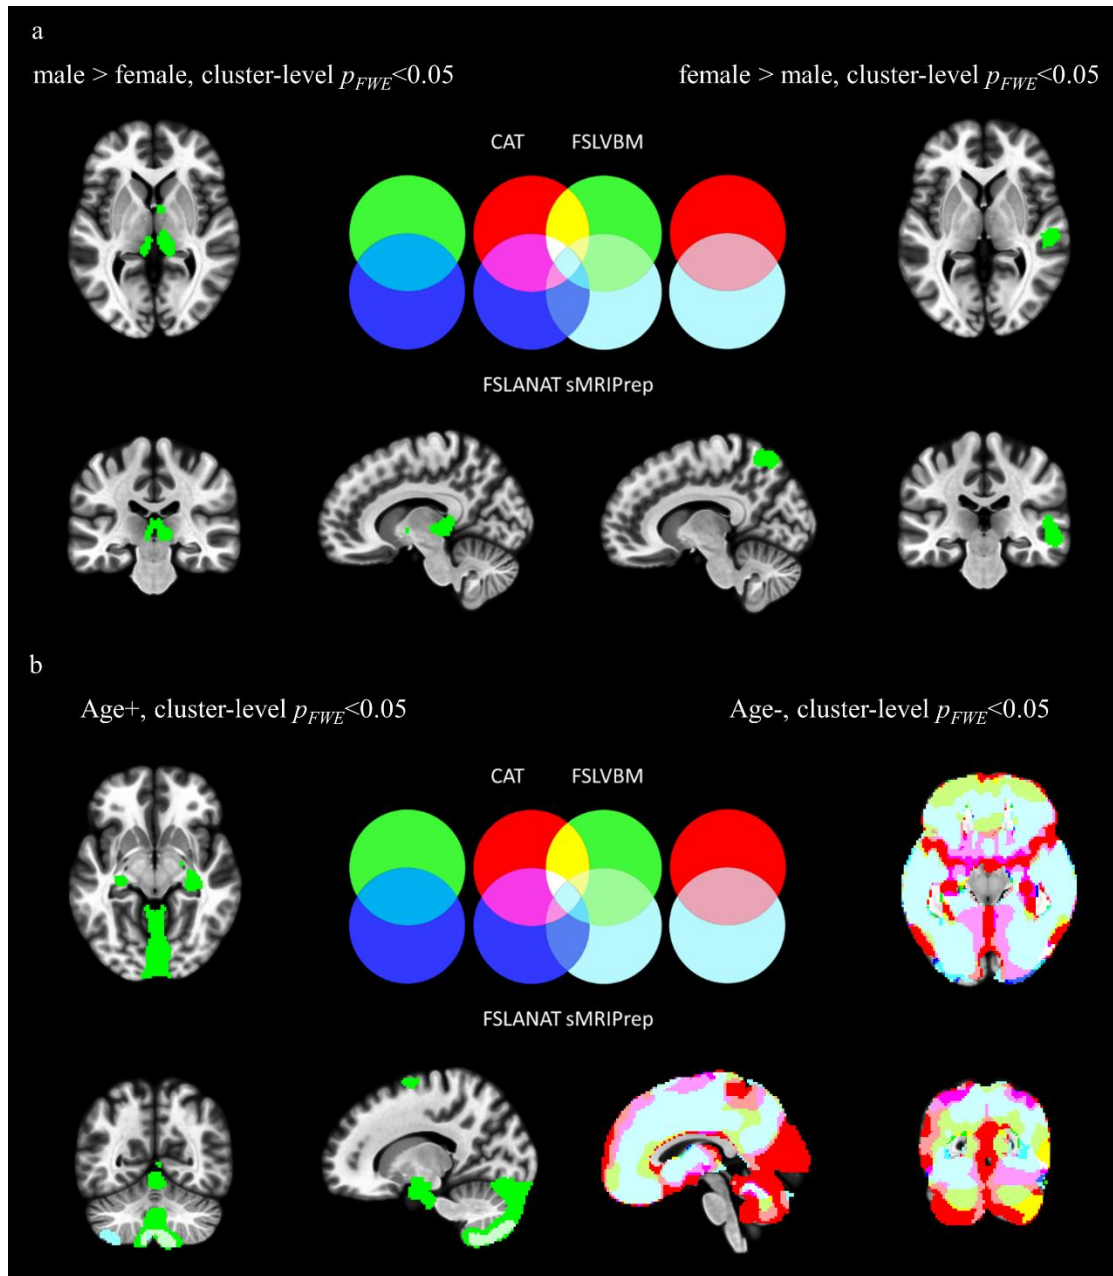

Fig. S9. Results regarding sex differences (a) and age associations (b) after excluding template effect and low spatial similarity data.

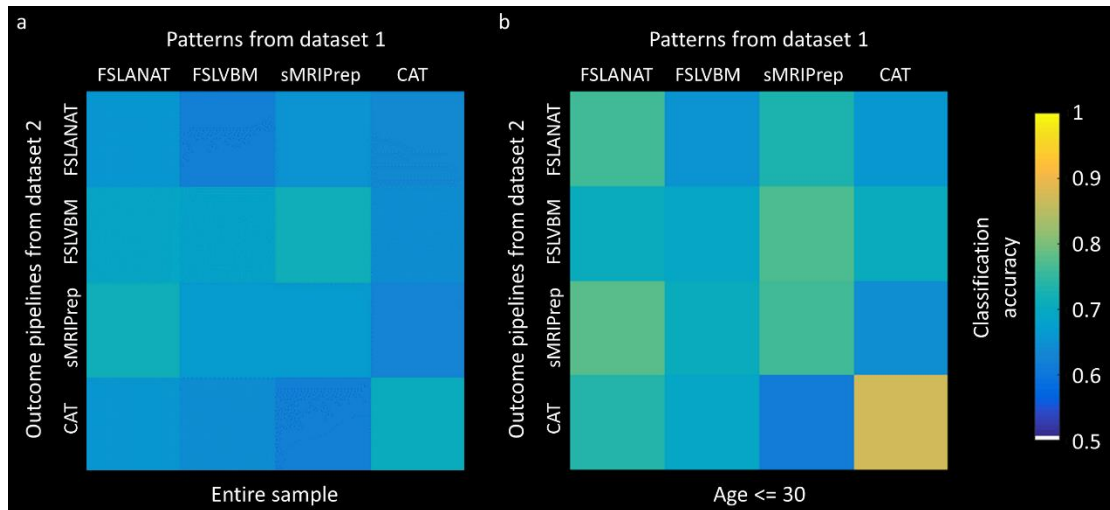

Fig. S10. Classification accuracy of patterns from dataset 1 on dataset 2 for (a) the entire sample, and (b) only age <= 30 (n = 159, female = 99).

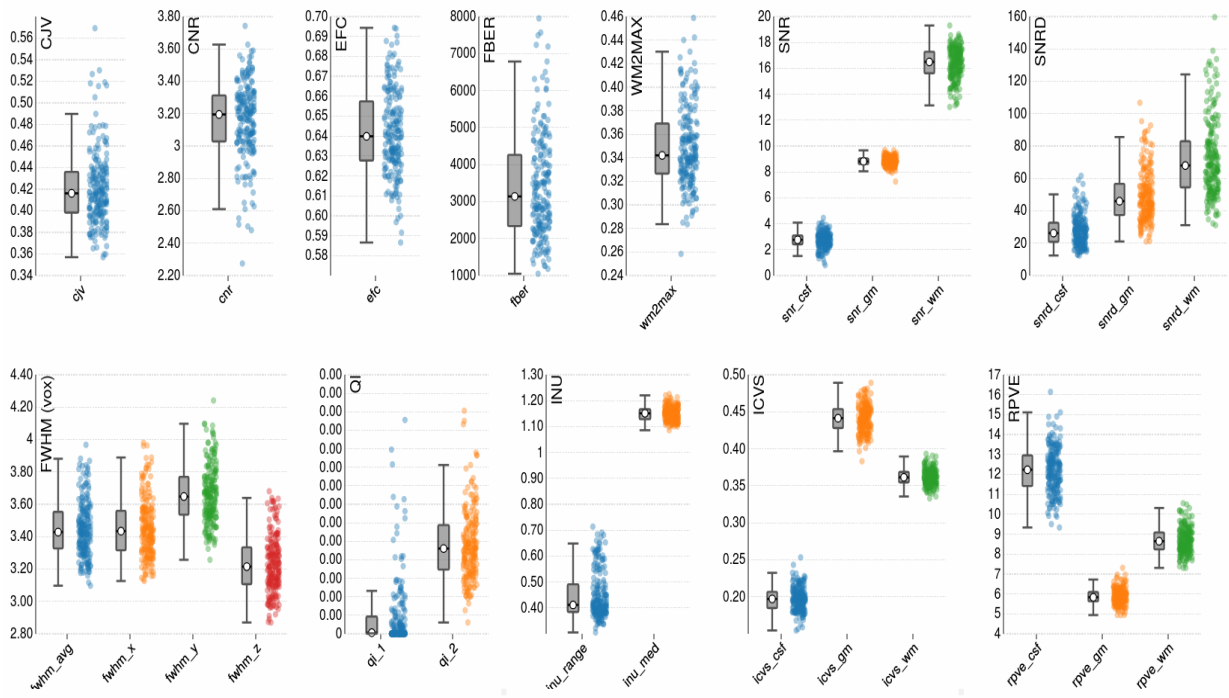

Fig. S11. Quality metrics for dataset 1.



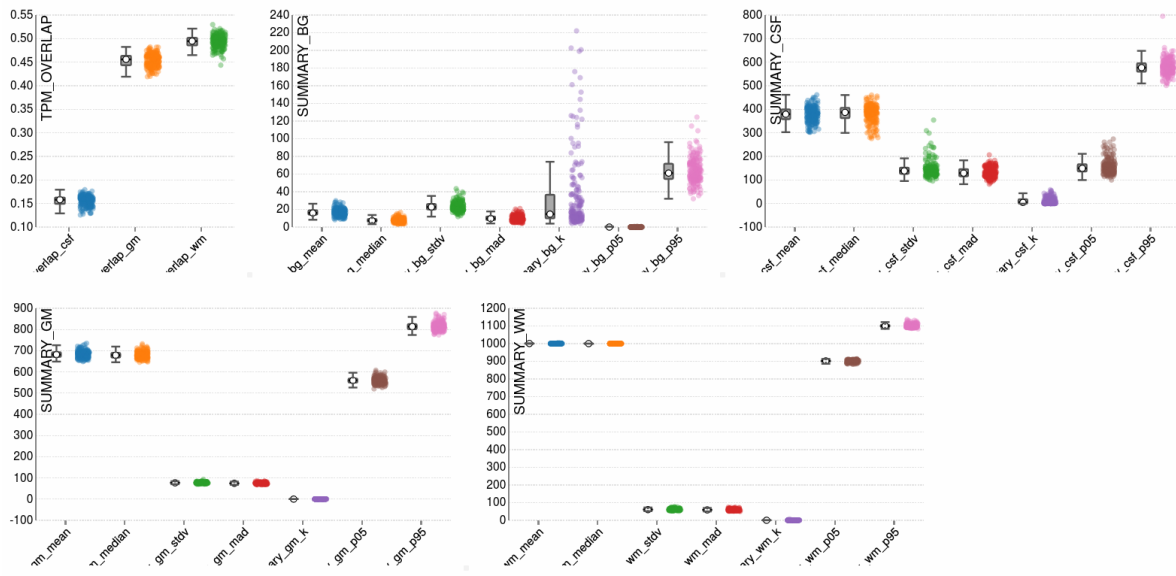

Fig. S12. Quality metrics for dataset 1.

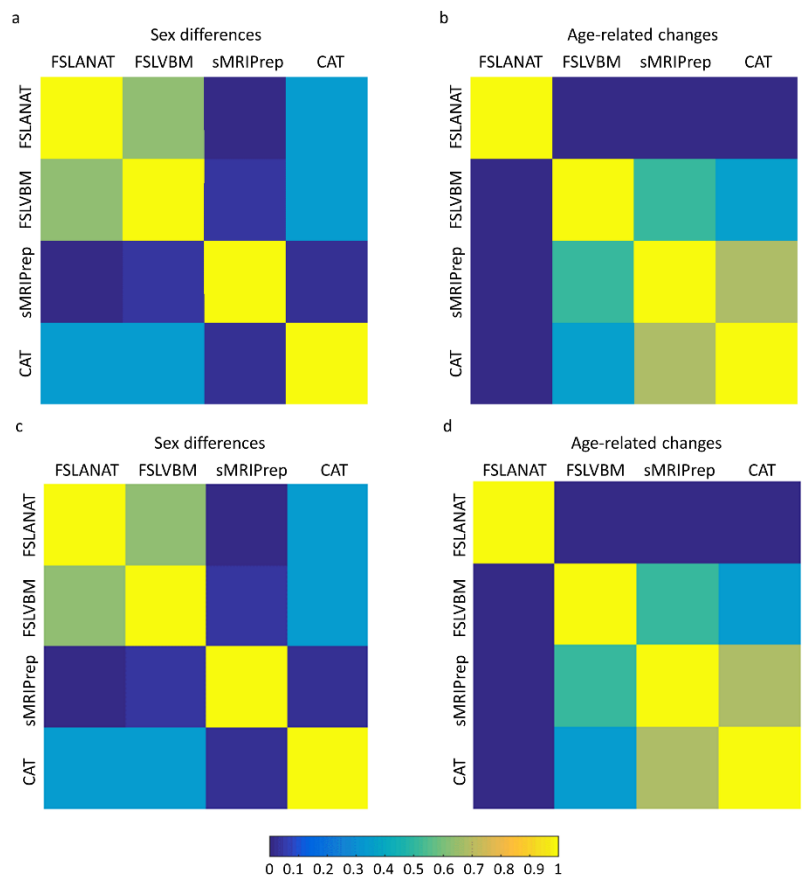

Fig. S13. Variability of unthresholded statistical maps. The correlation values between whole-brain unthresholded statistical maps of four pipelines were computed respectively for (a, c) sex differences, and (b, d) age-related effects. The different MNI templates do not affect the results between a/b using East Asian template, and c/d using Caucasian template. Only positive values are showed for display purpose.

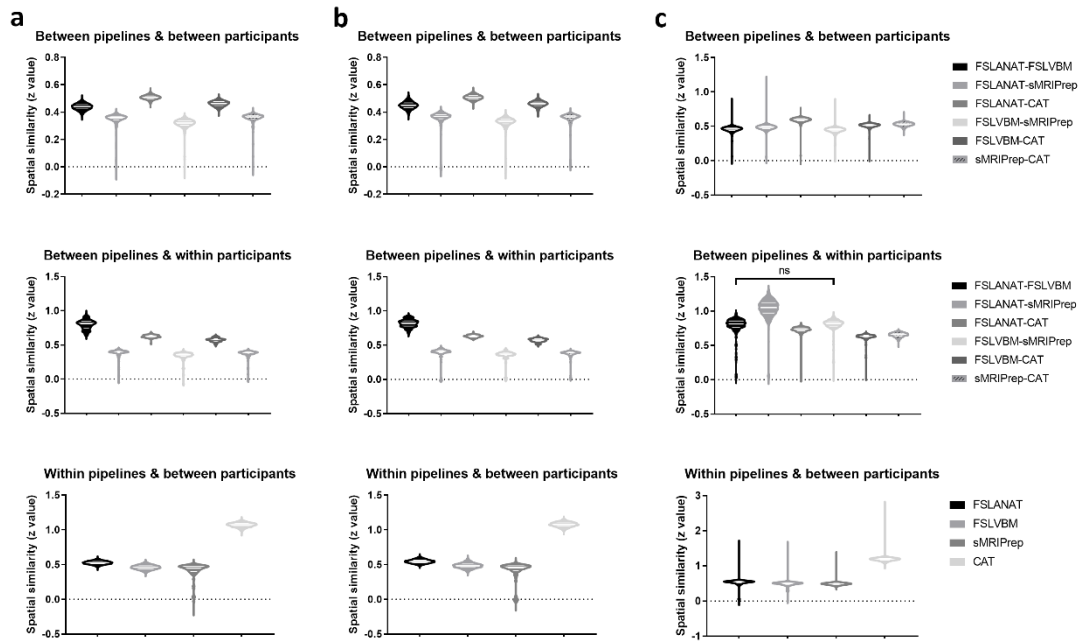

Fig. S14. The mean similarity and SD of different pipelines and pipelines' pairs for the unsmoothed data. The column a represents males, column b represents females, from dataset 1; column c represents dataset 2.

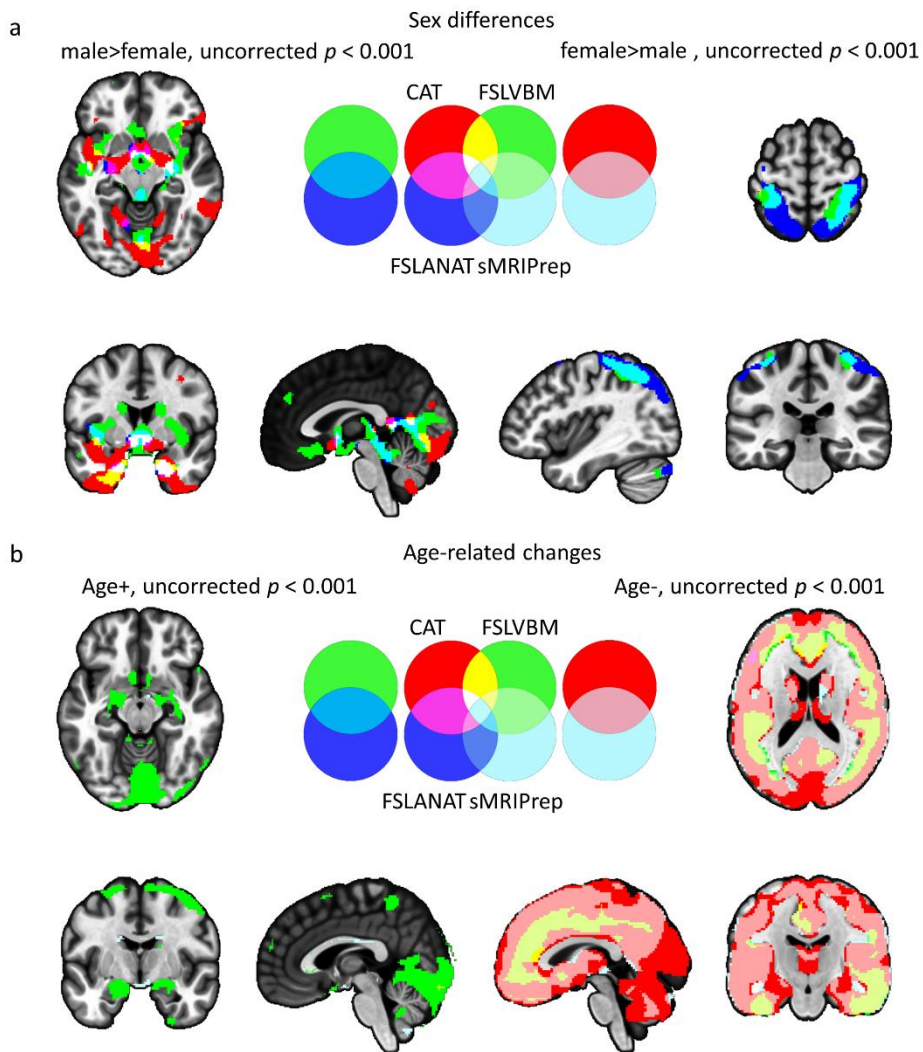

Fig. S15. Similarities and dissimilarities between the pipelines with respect to determining GMV sex differences and age-related GMV changes. Displayed in a and b are results from parametric statistic overlaps at uncorrected  $p < 0.001$ . The left panels of a display results for the male>female contrast. The right panels of a correspond to the female>male contrast. The left panels of b depicts brain regions with increasing GMV with age. The right panels of b depict decreases with age. Red = CAT, green = FSLVBM, blue = FSLANAT, light blue = sMRIPrep, other colors visualize the overlap between the results.

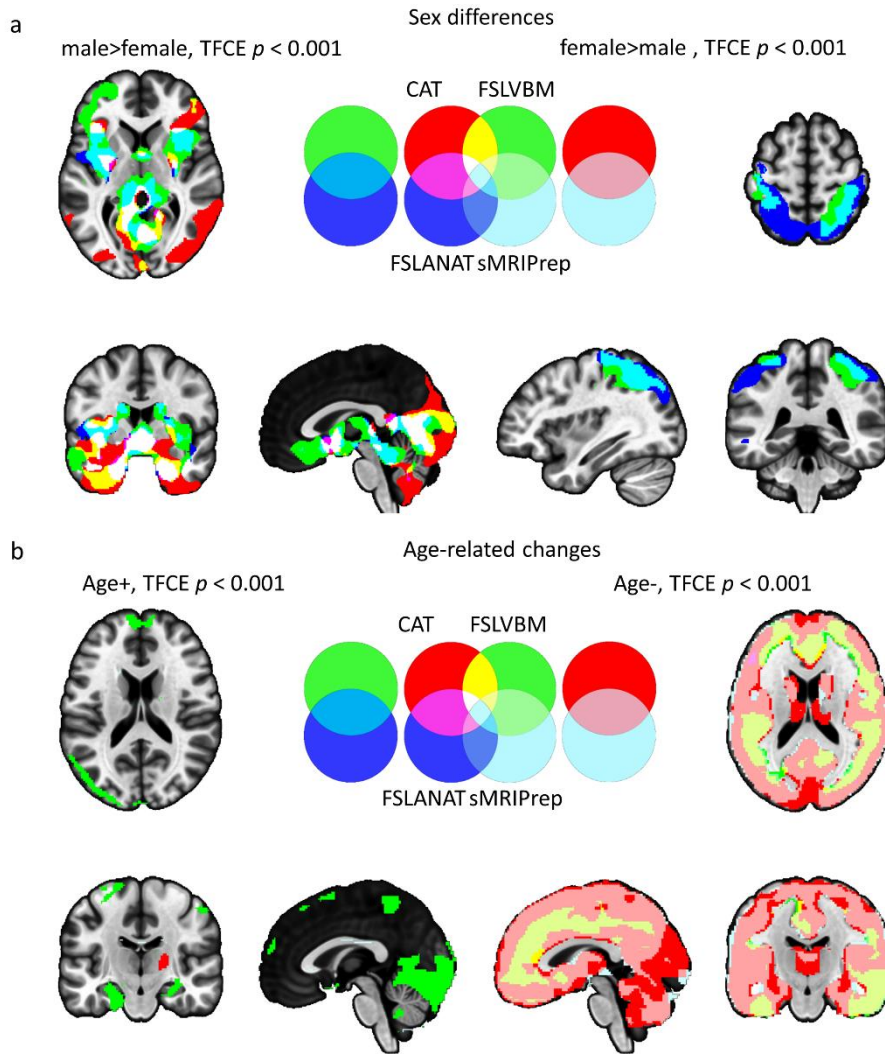

Fig. S16. Similarities and dissimilarities between the pipelines with respect to determining GMV sex differences. Displayed of a and b are results from non-parametric statistics (TFCE with 5,000 permutations) overlapping at  $p < 0.001$ . The left panels of a display results for the male>female contrast. The right panels of a correspond to the female>male contrast. The left panels of b depicts brain regions with increasing GMV with age. The right panels of b depict decreases with age. Red = CAT, green = FSLVBM, blue = FSLANAT, light blue = sMRIPrep, other colors visualize the overlap between the results.

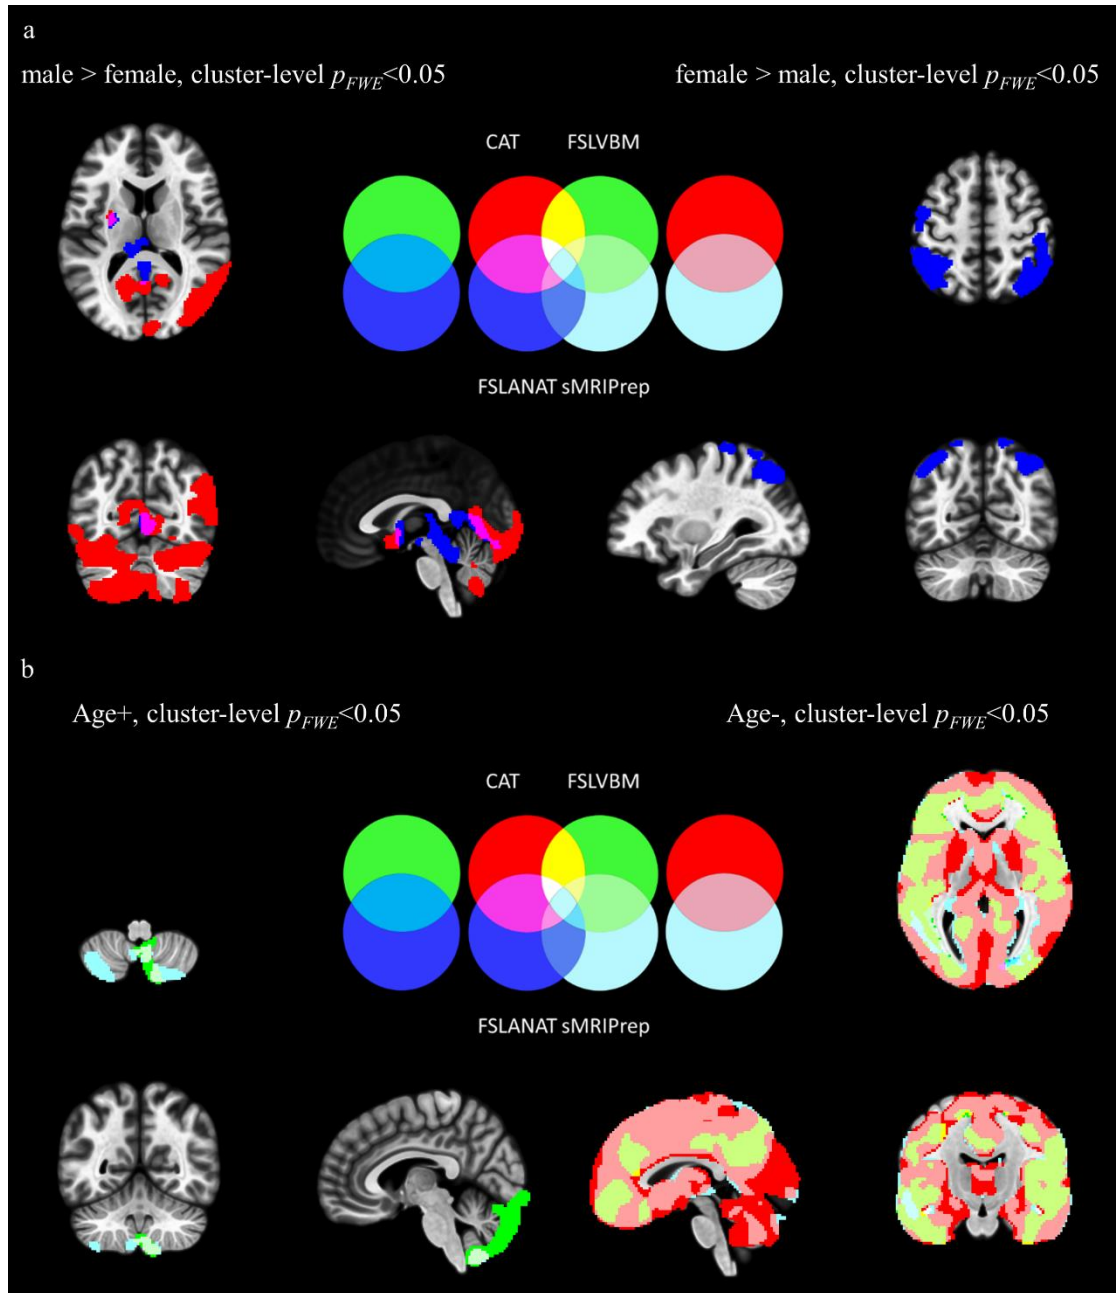

Fig. S17. Results regarding sex differences (a) and age associations (b) after excluding template effect and TIV calculation.

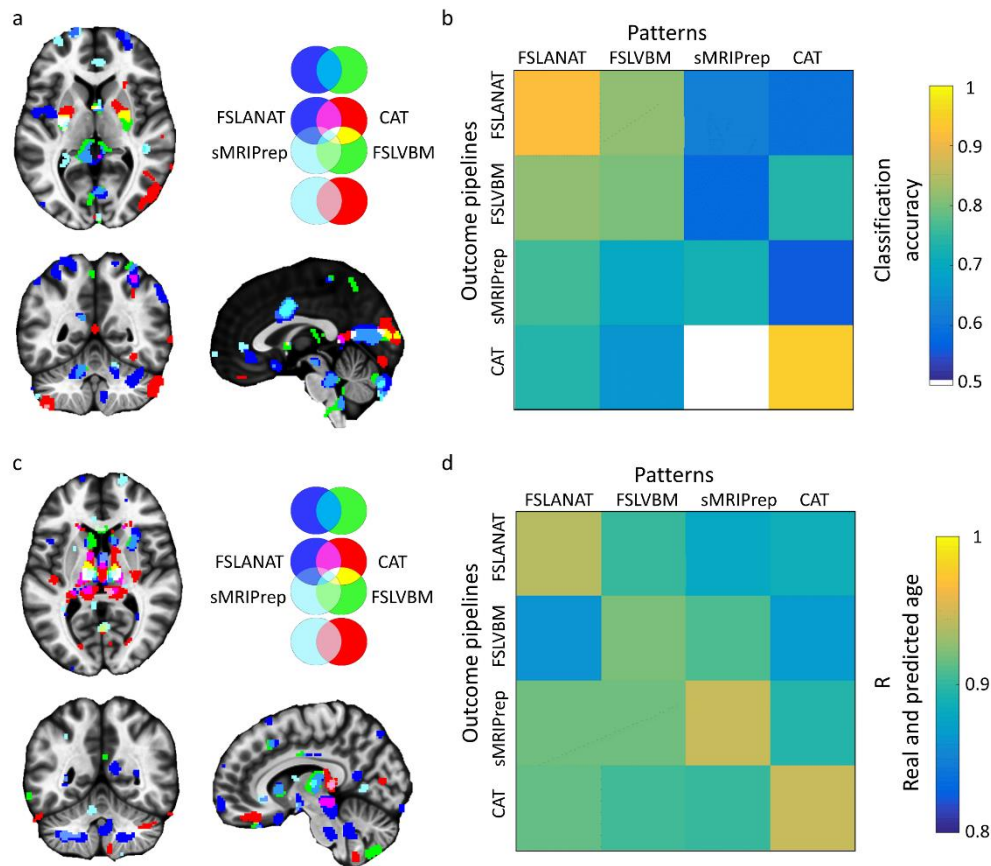

Fig. S18. Distributions and predicted performances of stable prediction patterns for (a, b) sex and (c, d) age after excluding template effect.

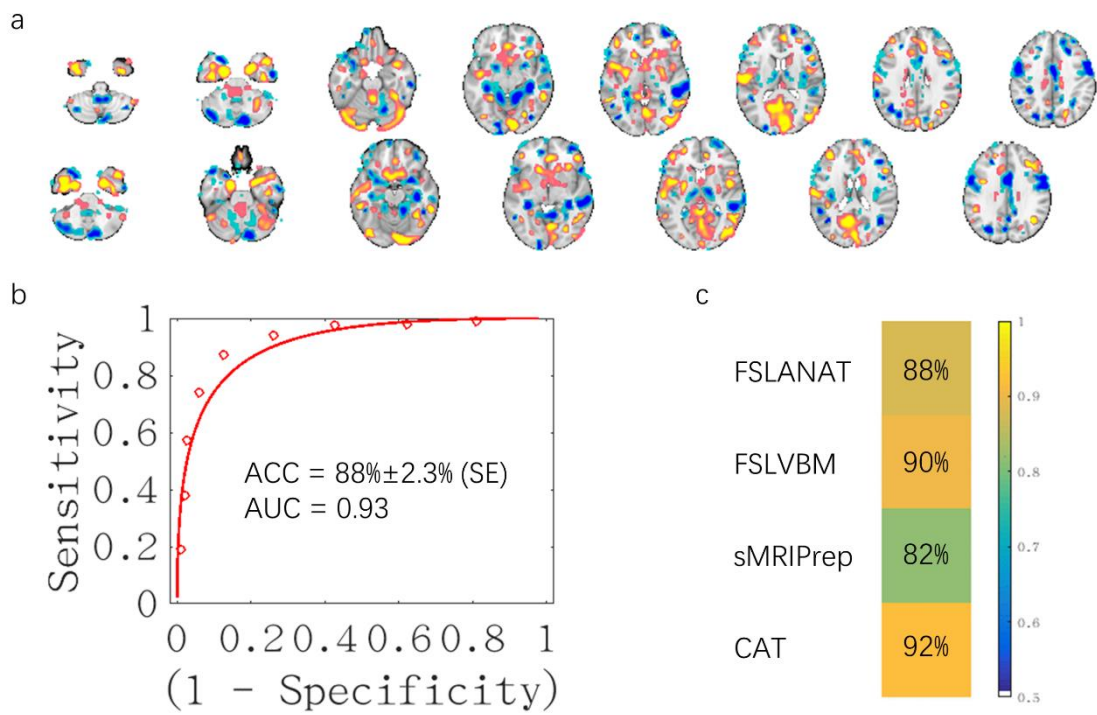

Fig. S19. Distributions and predicted performances of stable prediction patterns for sex.



### Supplemental tables

Table S1. Multiple comparisons for between-pipelines and between-participants spatial similarity of male

| Bonferroni's multiple comparisons test | Mean Diff. | 95.00% CI of diff.   | Adjusted P Value |
|----------------------------------------|------------|----------------------|------------------|
| FSLANAT-FSLVBM vs. FSLANAT-sMRIPrep    | 0.09092    | 0.08494 to 0.09690   | <0.0001          |
| FSLANAT-FSLVBM vs. FSLANAT-CAT         | -0.03750   | -0.04013 to -0.03487 | <0.0001          |
| FSLANAT-FSLVBM vs. FSLVBM-sMRIPrep     | 0.1520     | 0.1461 to 0.1578     | <0.0001          |
| FSLANAT-FSLVBM vs. FSLVBM-CAT          | 0.03990    | 0.03669 to 0.04311   | <0.0001          |
| FSLANAT-FSLVBM vs. sMRIPrep-CAT        | 0.1809     | 0.1752 to 0.1866     | <0.0001          |
| FSLANAT-sMRIPrep vs. FSLANAT-CAT       | -0.1284    | -0.1339 to -0.1229   | <0.0001          |
| FSLANAT-sMRIPrep vs. FSLVBM-sMRIPrep   | 0.06105    | 0.05878 to 0.06332   | <0.0001          |
| FSLANAT-sMRIPrep vs. FSLVBM-CAT        | -0.05102   | -0.05684 to -0.04520 | <0.0001          |
| FSLANAT-sMRIPrep vs. sMRIPrep-CAT      | 0.08998    | 0.08254 to 0.09741   | <0.0001          |
| FSLANAT-CAT vs. FSLVBM-sMRIPrep        | 0.1895     | 0.1841 to 0.1948     | <0.0001          |
| FSLANAT-CAT vs. FSLVBM-CAT             | 0.07740    | 0.07531 to 0.07949   | <0.0001          |
| FSLANAT-CAT vs. sMRIPrep-CAT           | 0.2184     | 0.2133 to 0.2235     | <0.0001          |
| FSLVBM-sMRIPrep vs. FSLVBM-CAT         | -0.1121    | -0.1171 to -0.1070   | <0.0001          |
| FSLVBM-sMRIPrep vs. sMRIPrep-CAT       | 0.02893    | 0.02166 to 0.03620   | <0.0001          |
| FSLVBM-CAT vs. sMRIPrep-CAT            | 0.1410     | 0.1356 to 0.1464     | <0.0001          |

Table S2. Multiple comparisons for between-pipelines and between-participants spatial similarity of female

| Bonferroni's multiple comparisons test | Mean Diff. | 95.00% CI of diff.   | Adjusted P Value |
|----------------------------------------|------------|----------------------|------------------|
| FSLANAT-FSLVBM vs. FSLANAT-sMRIPrep    | 0.1005     | 0.09391 to 0.1071    | <0.0001          |
| FSLANAT-FSLVBM vs. FSLANAT-CAT         | 0.007626   | 0.005233 to 0.01002  | <0.0001          |
| FSLANAT-FSLVBM vs. FSLVBM-sMRIPrep     | 0.1463     | 0.1401 to 0.1525     | <0.0001          |
| FSLANAT-FSLVBM vs. FSLVBM-CAT          | 0.07866    | 0.07588 to 0.08144   | <0.0001          |
| FSLANAT-FSLVBM vs. sMRIPrep-CAT        | 0.2164     | 0.2105 to 0.2224     | <0.0001          |
| FSLANAT-sMRIPrep vs. FSLANAT-CAT       | -0.09289   | -0.09950 to -0.08628 | <0.0001          |
| FSLANAT-sMRIPrep vs. FSLVBM-sMRIPrep   | 0.04578    | 0.04396 to 0.04759   | <0.0001          |
| FSLANAT-sMRIPrep vs. FSLVBM-CAT        | -0.02185   | -0.02864 to -0.01506 | <0.0001          |
| FSLANAT-sMRIPrep vs. sMRIPrep-CAT      | 0.1159     | 0.1074 to 0.1245     | <0.0001          |
| FSLANAT-CAT vs. FSLVBM-sMRIPrep        | 0.1387     | 0.1325 to 0.1448     | <0.0001          |
| FSLANAT-CAT vs. FSLVBM-CAT             | 0.07104    | 0.06956 to 0.07251   | <0.0001          |
| FSLANAT-CAT vs. sMRIPrep-CAT           | 0.2088     | 0.2034 to 0.2142     | <0.0001          |
| FSLVBM-sMRIPrep vs. FSLVBM-CAT         | -0.06763   | -0.07371 to -0.06155 | <0.0001          |
| FSLVBM-sMRIPrep vs. sMRIPrep-CAT       | 0.07014    | 0.06203 to 0.07825   | <0.0001          |
| FSLVBM-CAT vs. sMRIPrep-CAT            | 0.1378     | 0.1322 to 0.1434     | <0.0001          |

Table S3. Multiple comparisons for between-pipelines and within-participants spatial similarity of male

| Bonferroni's multiple comparisons test | Mean Diff. | 95.00% CI of diff.  | Adjusted P Value |
|----------------------------------------|------------|---------------------|------------------|
| FSLANAT-FSLVBM vs. FSLANAT-sMRIPrep    | 0.3494     | 0.2624 to 0.4364    | <0.0001          |
| FSLANAT-FSLVBM vs. FSLANAT-CAT         | 0.1633     | 0.1119 to 0.2146    | <0.0001          |
| FSLANAT-FSLVBM vs. FSLVBM-sMRIPrep     | 0.4362     | 0.3638 to 0.5087    | <0.0001          |
| FSLANAT-FSLVBM vs. FSLVBM-CAT          | 0.2816     | 0.2475 to 0.3157    | <0.0001          |
| FSLANAT-FSLVBM vs. sMRIPrep-CAT        | 0.5125     | 0.4334 to 0.5916    | <0.0001          |
| FSLANAT-sMRIPrep vs. FSLANAT-CAT       | -0.1861    | -0.2567 to -0.1155  | <0.0001          |
| FSLANAT-sMRIPrep vs. FSLVBM-sMRIPrep   | 0.08682    | 0.05555 to 0.1181   | <0.0001          |
| FSLANAT-sMRIPrep vs. FSLVBM-CAT        | -0.06780   | -0.1431 to 0.007462 | 0.1190           |
| FSLANAT-sMRIPrep vs. sMRIPrep-CAT      | 0.1631     | 0.1453 to 0.1809    | <0.0001          |
| FSLANAT-CAT vs. FSLVBM-sMRIPrep        | 0.2729     | 0.2039 to 0.3419    | <0.0001          |
| FSLANAT-CAT vs. FSLVBM-CAT             | 0.1183     | 0.08949 to 0.1471   | <0.0001          |
| FSLANAT-CAT vs. sMRIPrep-CAT           | 0.3492     | 0.2906 to 0.4077    | <0.0001          |
| FSLVBM-sMRIPrep vs. FSLVBM-CAT         | -0.1546    | -0.2189 to -0.09033 | <0.0001          |
| FSLVBM-sMRIPrep vs. sMRIPrep-CAT       | 0.07626    | 0.04582 to 0.1067   | <0.0001          |
| FSLVBM-CAT vs. sMRIPrep-CAT            | 0.2309     | 0.1671 to 0.2946    | <0.0001          |

Table S4. Multiple comparisons for between-pipelines and within-participants spatial similarity of female

| Bonferroni's multiple comparisons test | Mean Diff. | 95.00% CI of diff.  | Adjusted P Value |
|----------------------------------------|------------|---------------------|------------------|
| FSLANAT-FSLVBM vs. FSLANAT-sMRIPrep    | 0.3709     | 0.2862 to 0.4557    | <0.0001          |
| FSLANAT-FSLVBM vs. FSLANAT-CAT         | 0.2375     | 0.2022 to 0.2728    | <0.0001          |
| FSLANAT-FSLVBM vs. FSLVBM-sMRIPrep     | 0.4454     | 0.3737 to 0.5170    | <0.0001          |
| FSLANAT-FSLVBM vs. FSLVBM-CAT          | 0.3520     | 0.3282 to 0.3759    | <0.0001          |
| FSLANAT-FSLVBM vs. sMRIPrep-CAT        | 0.5745     | 0.5072 to 0.6418    | <0.0001          |
| FSLANAT-sMRIPrep vs. FSLANAT-CAT       | -0.1335    | -0.2144 to -0.05250 | <0.0001          |
| FSLANAT-sMRIPrep vs. FSLVBM-sMRIPrep   | 0.07445    | 0.05105 to 0.09784  | <0.0001          |
| FSLANAT-sMRIPrep vs. FSLVBM-CAT        | -0.01890   | -0.1022 to 0.06441  | >0.9999          |
| FSLANAT-sMRIPrep vs. sMRIPrep-CAT      | 0.2036     | 0.1796 to 0.2276    | <0.0001          |
| FSLANAT-CAT vs. FSLVBM-sMRIPrep        | 0.2079     | 0.1324 to 0.2834    | <0.0001          |
| FSLANAT-CAT vs. FSLVBM-CAT             | 0.1146     | 0.09476 to 0.1344   | <0.0001          |
| FSLANAT-CAT vs. sMRIPrep-CAT           | 0.3370     | 0.2767 to 0.3974    | <0.0001          |
| FSLVBM-sMRIPrep vs. FSLVBM-CAT         | -0.09335   | -0.1672 to -0.01951 | 0.0037           |
| FSLVBM-sMRIPrep vs. sMRIPrep-CAT       | 0.1291     | 0.1009 to 0.1574    | <0.0001          |
| FSLVBM-CAT vs. sMRIPrep-CAT            | 0.2225     | 0.1584 to 0.2865    | <0.0001          |

Table S5. Multiple comparisons for within-pipelines and between-participants spatial similarity of male

| Bonferroni's multiple comparisons test | Mean Diff. | 95.00% CI of diff. | Adjusted P Value |
|----------------------------------------|------------|--------------------|------------------|
| FSLANAT vs. FSLVBM                     | 0.08878    | 0.08378 to 0.09378 | <0.0001          |
| FSLANAT vs. sMRIPrep                   | 0.2117     | 0.2010 to 0.2223   | <0.0001          |
| FSLANAT vs. CAT                        | -0.4077    | -0.4105 to -0.4048 | <0.0001          |
| FSLVBM vs. sMRIPrep                    | 0.1229     | 0.1112 to 0.1345   | <0.0001          |
| FSLVBM vs. CAT                         | -0.4964    | -0.5015 to -0.4914 | <0.0001          |
| sMRIPrep vs. CAT                       | -0.6193    | -0.6301 to -0.6085 | <0.0001          |

Table S6. Multiple comparisons for within-pipelines and between-participants spatial similarity of female

| Bonferroni's multiple comparisons test | Mean Diff. | 95.00% CI of diff. | Adjusted P Value |
|----------------------------------------|------------|--------------------|------------------|
| FSLANAT vs. FSLVBM                     | 0.05479    | 0.05050 to 0.05909 | <0.0001          |
| FSLANAT vs. sMRIPrep                   | 0.2404     | 0.2275 to 0.2532   | <0.0001          |
| FSLANAT vs. CAT                        | -0.3749    | -0.3770 to -0.3727 | <0.0001          |
| FSLVBM vs. sMRIPrep                    | 0.1856     | 0.1720 to 0.1991   | <0.0001          |
| FSLVBM vs. CAT                         | -0.4297    | -0.4343 to -0.4250 | <0.0001          |
| sMRIPrep vs. CAT                       | -0.6152    | -0.6282 to -0.6022 | <0.0001          |

Table S7. Multiple comparisons for between-pipelines and between-participants spatial similarity of dataset 2

| Bonferroni's multiple comparisons test | Mean Diff. | 95.00% CI of diff.     | Adjusted P Value |
|----------------------------------------|------------|------------------------|------------------|
| FSLANAT-FSLVBM vs. FSLANAT-sMRIPrep    | -0.03518   | -0.03583 to -0.03453   | <0.0001          |
| FSLANAT-FSLVBM vs. FSLANAT-CAT         | -0.1328    | -0.1336 to -0.1320     | <0.0001          |
| FSLANAT-FSLVBM vs. FSLVBM-sMRIPrep     | -0.03569   | -0.03689 to -0.03449   | <0.0001          |
| FSLANAT-FSLVBM vs. FSLVBM-CAT          | 0.02268    | 0.02154 to 0.02382     | <0.0001          |
| FSLANAT-FSLVBM vs. sMRIPrep-CAT        | -0.01869   | -0.01971 to -0.01767   | <0.0001          |
| FSLANAT-sMRIPrep vs. FSLANAT-CAT       | -0.09763   | -0.09811 to -0.09715   | <0.0001          |
| FSLANAT-sMRIPrep vs. FSLVBM-sMRIPrep   | -0.0005106 | -0.001524 to 0.0005024 | >0.9999          |
| FSLANAT-sMRIPrep vs. FSLVBM-CAT        | 0.05786    | 0.05688 to 0.05884     | <0.0001          |
| FSLANAT-sMRIPrep vs. sMRIPrep-CAT      | 0.01649    | 0.01563 to 0.01734     | <0.0001          |
| FSLANAT-CAT vs. FSLVBM-sMRIPrep        | 0.09712    | 0.09597 to 0.09827     | <0.0001          |
| FSLANAT-CAT vs. FSLVBM-CAT             | 0.1555     | 0.1544 to 0.1565       | <0.0001          |
| FSLANAT-CAT vs. sMRIPrep-CAT           | 0.1141     | 0.1132 to 0.1150       | <0.0001          |
| FSLVBM-sMRIPrep vs. FSLVBM-CAT         | 0.05837    | 0.05797 to 0.05877     | <0.0001          |
| FSLVBM-sMRIPrep vs. sMRIPrep-CAT       | 0.01700    | 0.01618 to 0.01781     | <0.0001          |
| FSLVBM-CAT vs. sMRIPrep-CAT            | -0.04137   | -0.04194 to -0.04080   | <0.0001          |

Table S8. Multiple comparisons for between-pipelines and within-participants spatial similarity of dataset 2

| Bonferroni's multiple comparisons test | Mean Diff. | 95.00% CI of diff.   | Adjusted P Value |
|----------------------------------------|------------|----------------------|------------------|
| FSLANAT-FSLVBM vs. FSLANAT-sMRIPrep    | -0.1898    | -0.2134 to -0.1661   | <0.0001          |
| FSLANAT-FSLVBM vs. FSLANAT-CAT         | 0.01048    | -0.01726 to 0.03822  | >0.9999          |
| FSLANAT-FSLVBM vs. FSLVBM-sMRIPrep     | -0.1046    | -0.1304 to -0.07874  | <0.0001          |
| FSLANAT-FSLVBM vs. FSLVBM-CAT          | 0.2493     | 0.2224 to 0.2762     | <0.0001          |
| FSLANAT-FSLVBM vs. sMRIPrep-CAT        | 0.1713     | 0.1369 to 0.2057     | <0.0001          |
| FSLANAT-sMRIPrep vs. FSLANAT-CAT       | 0.2002     | 0.1820 to 0.2185     | <0.0001          |
| FSLANAT-sMRIPrep vs. FSLVBM-sMRIPrep   | 0.08520    | 0.04686 to 0.1235    | <0.0001          |
| FSLANAT-sMRIPrep vs. FSLVBM-CAT        | 0.4391     | 0.4058 to 0.4724     | <0.0001          |
| FSLANAT-sMRIPrep vs. sMRIPrep-CAT      | 0.3611     | 0.3304 to 0.3918     | <0.0001          |
| FSLANAT-CAT vs. FSLVBM-sMRIPrep        | -0.1150    | -0.1523 to -0.07781  | <0.0001          |
| FSLANAT-CAT vs. FSLVBM-CAT             | 0.2388     | 0.2098 to 0.2678     | <0.0001          |
| FSLANAT-CAT vs. sMRIPrep-CAT           | 0.1608     | 0.1354 to 0.1863     | <0.0001          |
| FSLVBM-sMRIPrep vs. FSLVBM-CAT         | 0.3539     | 0.3376 to 0.3702     | <0.0001          |
| FSLVBM-sMRIPrep vs. sMRIPrep-CAT       | 0.2759     | 0.2479 to 0.3038     | <0.0001          |
| FSLVBM-CAT vs. sMRIPrep-CAT            | -0.07800   | -0.09320 to -0.06281 | <0.0001          |



Table S9. Multiple comparisons for within-pipelines and between-participants spatial similarity of dataset 2

| Bonferroni's multiple comparisons test | Mean Diff. | 95.00% CI of diff.     | Adjusted P Value |
|----------------------------------------|------------|------------------------|------------------|
| FSLANAT vs. FSLVBM                     | -0.05583   | -0.05793 to -0.05372   | <0.0001          |
| FSLANAT vs. sMRIPrep                   | -0.003483  | -0.005081 to -0.001885 | <0.0001          |
| FSLANAT vs. CAT                        | -0.4597    | -0.4612 to -0.4581     | <0.0001          |
| FSLVBM vs. sMRIPrep                    | 0.05234    | 0.05089 to 0.05379     | <0.0001          |
| FSLVBM vs. CAT                         | -0.4038    | -0.4053 to -0.4023     | <0.0001          |
| sMRIPrep vs. CAT                       | -0.4562    | -0.4567 to -0.4557     | <0.0001          |

Table S10. Image intraclass correlation coefficient (I2C2) across pipelines

|                      | I2C2   | 95% CI <sup>1</sup> |
|----------------------|--------|---------------------|
| Dataset 1            |        |                     |
| FSLANAT vs. FSLVBM   | 0.1802 | 0.1535 to 0.2062    |
| FSLANAT vs. sMRIPrep | 0.0489 | 0.0190 to 0.1067    |
| FSLANAT vs. CAT      | 0.2983 | 0.2711 to 0.3247    |
| FSLVBM vs. sMRIPrep  | 0.0695 | 0.0337 to 0.1382    |
| FSLVBM vs. CAT       | 0.3750 | 0.3445 to 0.4035    |
| sMRIPrep vs. CAT     | 0.0994 | 0.0574 to 0.1901    |
| Across all pipelines | 0.1613 | 0.0996 to 0.2579    |
| Dataset 2            |        |                     |
| FSLANAT vs. FSLVBM   | 0.1180 | 0.0948 to 0.1441    |
| FSLANAT vs. sMRIPrep | 0.1205 | 0.0982 to 0.1424    |
| FSLANAT vs. CAT      | 0.2437 | 0.2019 to 0.2860    |
| FSLVBM vs. sMRIPrep  | 0.1344 | 0.1118 to 0.1604    |
| FSLVBM vs. CAT       | 0.3061 | 0.2617 to 0.3596    |
| sMRIPrep vs. CAT     | 0.3439 | 0.3247 to 0.3634    |
| Across all pipelines | 0.2656 | 0.2357 to 0.2960    |

<sup>1</sup> 95% confidence interval implemented by 5000 bootstrapping

Table S11. Percent overlap of prediction pattern between the pipelines

|                                                  | Sex <sup>1</sup> | Age <sup>1</sup> |
|--------------------------------------------------|------------------|------------------|
| CAT (unique)                                     | 21.40%           | 19.95%           |
| FSLVBM (unique)                                  | 13.35%           | 20.37%           |
| FSLANAT (unique)                                 | 35.22%           | 28.51%           |
| sMRIPrep (unique)                                | 9.77%            | 4.73%            |
| CAT $\cap$ FSLVBM                                | 1.40%            | 1.97%            |
| CAT $\cap$ FSLANAT                               | 1.97%            | 4.23%            |
| CAT $\cap$ sMRIPrep                              | 0.29%            | 0.74%            |
| FSLVBM $\cap$ FSLANAT                            | 7.03%            | 6.68%            |
| FSLVBM $\cap$ sMRIPrep                           | 1.03%            | 1.74%            |
| FSLANAT $\cap$ sMRIPrep                          | 3.58%            | 3.04%            |
| CAT $\cap$ FSLVBM $\cap$ FSLANAT                 | 1.03%            | 2.14%            |
| CAT $\cap$ FSLVBM $\cap$ sMRIPrep                | 0.37%            | 0.07%            |
| CAT $\cap$ FSLANAT $\cap$ sMRIPrep               | 0.05%            | 1.04%            |
| FSLVBM $\cap$ FSLANAT $\cap$ sMRIPrep            | 3.19%            | 2.39%            |
| CAT $\cap$ FSLVBM $\cap$ FSLANAT $\cap$ sMRIPrep | 0.31%            | 2.39%            |

<sup>1</sup> Bootstrapping test,  $p_{FDR} < 0.05$

Table S12. Prediction performance of sex between the pipelines

| ACC (SE) <sup>1</sup> , AUC <sup>2</sup> | FSLANAT         | FSLVBM          | sMRIPrep        | CAT             |
|------------------------------------------|-----------------|-----------------|-----------------|-----------------|
| FSLANAT                                  | 92% (3.8), 0.98 | 86% (4.9), 0.92 | 62% (6.9), 0.74 | 58% (7.0), 0.60 |
| FSLVBM                                   | 90% (4.2), 0.96 | 88% (4.6), 0.94 | 50% (7.1), 0.61 | 74% (6.2), 0.84 |
| sMRIPrep                                 | 80% (5.7), 0.89 | 76% (6.0), 0.86 | 68% (6.6), 0.77 | 58% (7.0), 0.62 |
| CAT                                      | 72% (6.3), 0.79 | 76% (6.0), 0.79 | 14% (4.9), 0.09 | 94% (3.4), 0.99 |

<sup>1</sup> accuracy (stand error)

<sup>2</sup> nonparametric area under the curve (AUC)

Table S13. Cohen's d for each classification of male and female

|                                         | FSLANAT | FSLVBM | sMRIPrep | CAT    |
|-----------------------------------------|---------|--------|----------|--------|
| Testing sample from dataset 1           |         |        |          |        |
| FSLANAT                                 | 2.0260  | 1.4821 | 0.5963   | 0.1392 |
| FSLVBM                                  | 1.4589  | 1.4798 | 0.2930   | 0.6472 |
| SMRIPrep                                | 0.6437  | 0.7231 | 0.2967   | 0.1693 |
| CAT                                     | 0.7810  | 0.7402 | -1.4909  | 2.2815 |
| Testing sample from dataset 2 (age<=30) |         |        |          |        |
| FSLANAT                                 | 1.0091  | 0.5780 | 0.4651   | 0.4242 |
| FSLVBM                                  | 0.8998  | 0.8162 | 0.6787   | 0.2237 |
| SMRIPrep                                | 1.2160  | 0.8602 | 1.1182   | 0.2635 |
| CAT                                     | 0.7471  | 0.7350 | -1.0130  | 2.2062 |

Table S14. Percent overlap of age associated negative GMV-changes between the pipelines controlling for template effect and sample homogeneity

|                                                  | Negative association    |
|--------------------------------------------------|-------------------------|
|                                                  | Parametric <sup>1</sup> |
| CAT (unique)                                     | 11.84%                  |
| FSLVBM (unique)                                  | 1.12%                   |
| FSLANAT (unique)                                 | 0.53%                   |
| sMRIPrep (unique)                                | 1.28%                   |
| CAT $\cap$ FSLVBM                                | 1.87%                   |
| CAT $\cap$ FSLANAT                               | 3.17%                   |
| CAT $\cap$ sMRIPrep                              | 6.46%                   |
| FSLVBM $\cap$ FSLANAT                            | 0.19%                   |
| FSLVBM $\cap$ sMRIPrep                           | 0.81%                   |
| FSLANAT $\cap$ sMRIPrep                          | 0.57%                   |
| CAT $\cap$ FSLVBM $\cap$ FSLANAT                 | 0.72                    |
| CAT $\cap$ FSLVBM $\cap$ sMRIPrep                | 12.18%                  |
| CAT $\cap$ FSLANAT $\cap$ sMRIPrep               | 9.09%                   |
| FSLVBM $\cap$ FSLANAT $\cap$ sMRIPrep            | 1.57                    |
| CAT $\cap$ FSLVBM $\cap$ FSLANAT $\cap$ sMRIPrep | 48.60%                  |

<sup>1</sup>cluster-level  $p_{FWE} < 0.05$

Table S15. Prediction performance of sex between the pipelines (independent test dataset) with common template

| ACC (SE) <sup>1</sup> , AUC <sup>2</sup> | FSLANAT         | FSLVBM          | sMRIPrep        | CAT             |
|------------------------------------------|-----------------|-----------------|-----------------|-----------------|
| FSLANAT                                  | 92% (3.8), 0.97 | 82% (5.4), 0.87 | 62% (6.9), 0.76 | 60% (6.9), 0.59 |
| FSLVBM                                   | 82% (5.4), 0.93 | 80% (5.7), 0.88 | 58% (7.0), 0.65 | 74% (6.2), 0.84 |
| sMRIPrep                                 | 76% (6.0), 0.85 | 70% (6.5), 0.73 | 72% (6.3), 0.77 | 56% (7.0), 0.58 |
| CAT                                      | 74% (6.2), 0.77 | 66% (6.7), 0.69 | 14% (4.9), 0.08 | 94% (3.4), 0.99 |

<sup>1</sup> accuracy (stand error)

<sup>2</sup> nonparametric area under the curve (AUC)

Table S16. Percent overlap of prediction pattern between the pipelines with common template

|                                                  | Sex    | Age    |
|--------------------------------------------------|--------|--------|
| CAT (unique)                                     | 22.49% | 24.38% |
| FSLVBM (unique)                                  | 11.20% | 9.47%  |
| FSLANAT (unique)                                 | 35.30% | 31.96% |
| sMRIPrep (unique)                                | 9.09%  | 6.70%  |
| CAT $\cap$ FSLVBM                                | 1.28%  | 1.11%  |
| CAT $\cap$ FSLANAT                               | 1.67%  | 5.13%  |
| CAT $\cap$ sMRIPrep                              | 0.17%  | 0.66%  |
| FSLVBM $\cap$ FSLANAT                            | 10.93% | 5.59%  |
| FSLVBM $\cap$ sMRIPrep                           | 0.27%  | 2.10%  |
| FSLANAT $\cap$ sMRIPrep                          | 2.16%  | 4.33%  |
| CAT $\cap$ FSLVBM $\cap$ FSLANAT                 | 1.69%  | 2.23%  |
| CAT $\cap$ FSLVBM $\cap$ sMRIPrep                | 0.11%  | 0.23%  |
| CAT $\cap$ FSLANAT $\cap$ sMRIPrep               | 0.02%  | 1.22%  |
| FSLVBM $\cap$ FSLANAT $\cap$ sMRIPrep            | 3.44%  | 2.16%  |
| CAT $\cap$ FSLVBM $\cap$ FSLANAT $\cap$ sMRIPrep | 0.16%  | 2.73%  |

<sup>1</sup> Bootstrapping test,  $p_{FDR} < 0.05$



### Supplementary References

- 1 Wei, D. *et al.* Structural and functional brain scans from the cross-sectional Southwest University adult lifespan dataset. *Sci Data* **5**, 180134, doi:10.1038/sdata.2018.134 (2018).
- 2 Yan, C. G., Wang, X. D., Zuo, X. N. & Zang, Y. F. DPABI: Data Processing & Analysis for (Resting-State) Brain Imaging. *Neuroinformatics* **14**, 339-351, doi:10.1007/s12021-016-9299-4 (2016).
- 3 Ashburner, J. & Friston, K. J. Diffeomorphic registration using geodesic shooting and Gauss-Newton optimisation. *Neuroimage* **55**, 954-967, doi:10.1016/j.neuroimage.2010.12.049 (2011).
